# Supplementary material for: Genome-Wide Association Study to Identify the Genetic Determinants of Otitis Media Susceptibility in Childhood
Source: PubMed Central journal article supplement (PMC3485007; doi:10.1371/journal.pone.0048215), 2012-10-25

**Figure S1. (A)** Ethnic spread of Raine Study participants compared to the four HapMap populations. The Raine Study population (RAINE) is in red, Caucasian population (CEU) in blue, Japanese and Chinese population (JPT+CHB) in green and African population (YRI) in purple. **(B)** Quantile-quantile plot of the observed versus expected  $\log_{10}$ (P-value) following PC adjustment.

**(A)**

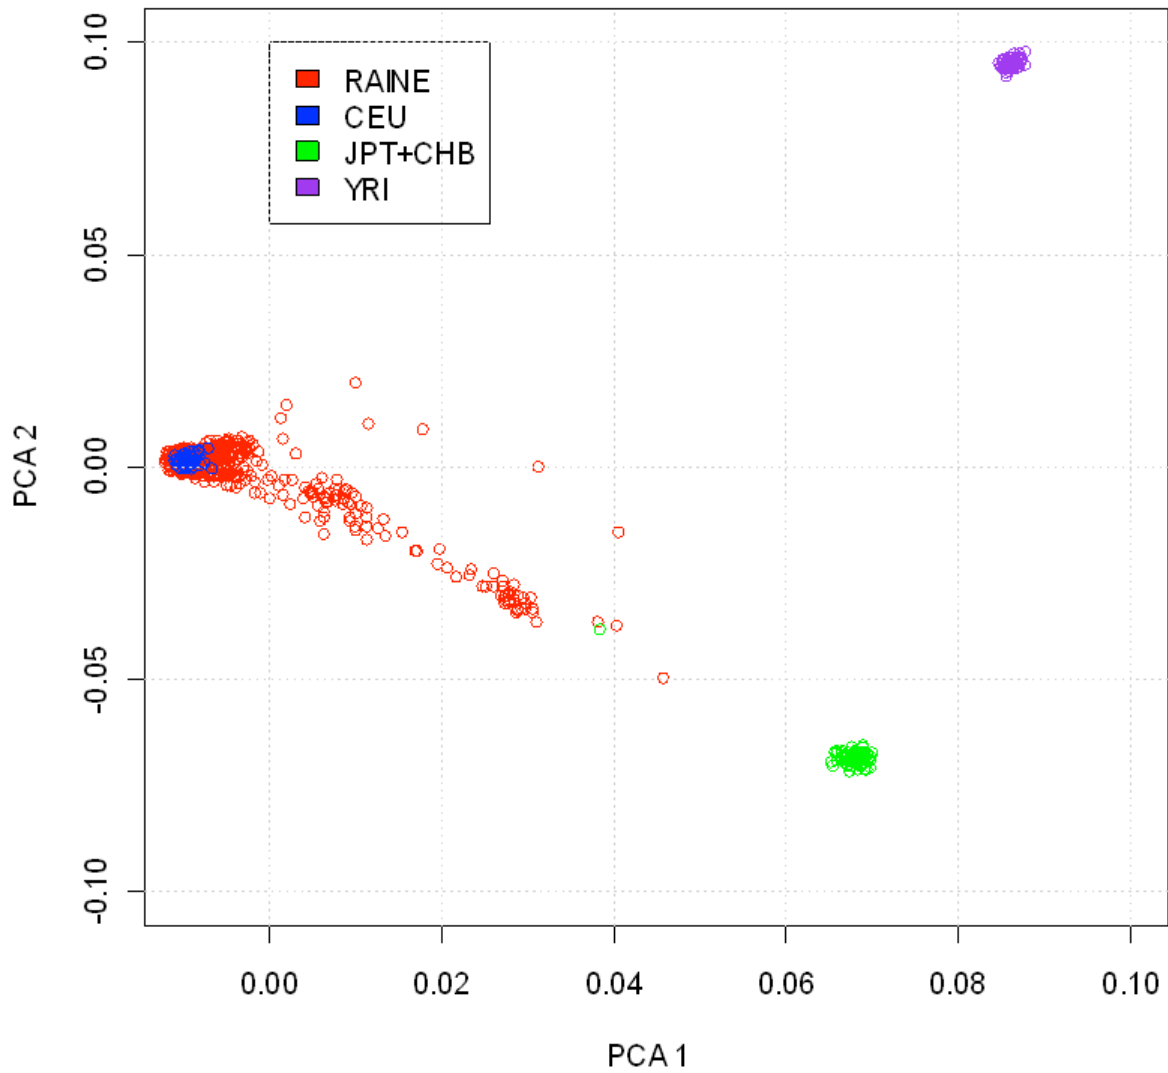

(B)

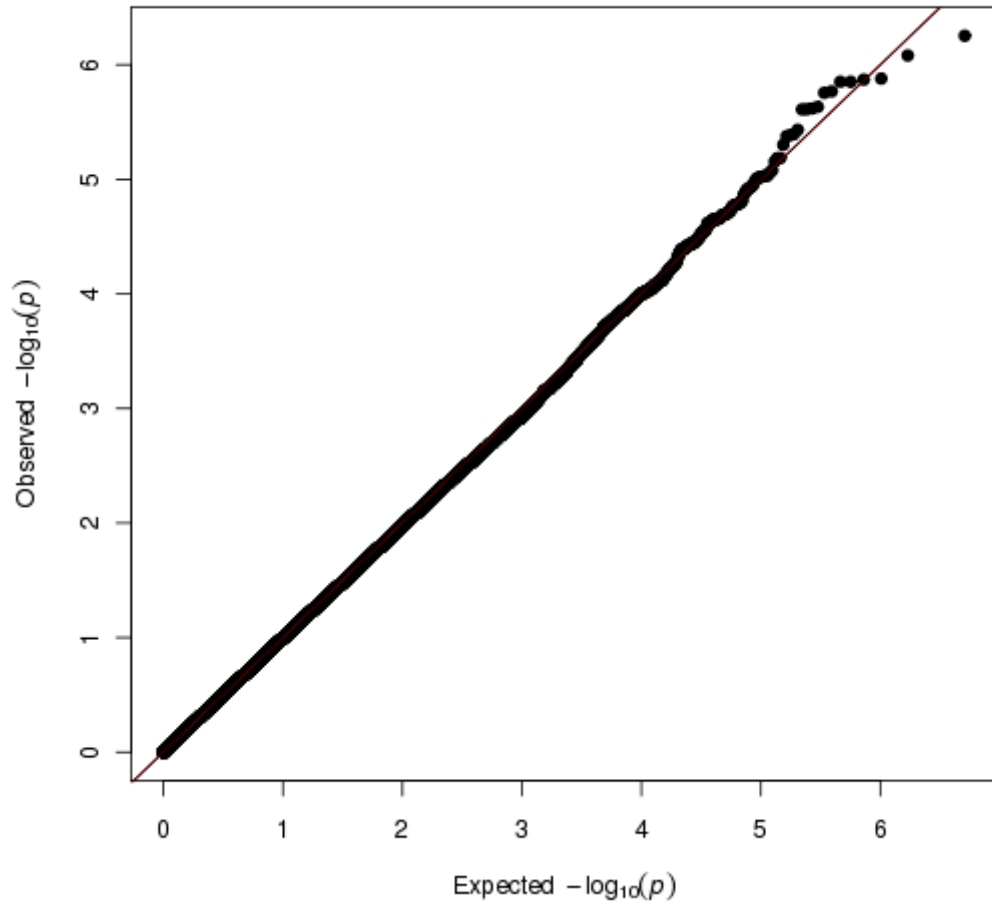

Supplement: pone.0048215.s001.pdf [file pone.0048215.s001.pdf]
