# Supplementary material for: Genome-Wide Association Study to Identify the Genetic Determinants of Otitis Media Susceptibility in Childhood
Source: PubMed Central journal article supplement (PMC3485007; doi:10.1371/journal.pone.0048215), 2012-10-25
Supplement: pone.0048215.s005.pdf [file pone.0048215.s005.pdf]

**Table S1.** Analysis in GenABEL showing the influence of adjustment for clinical and environmental covariates on associations with OM in 831 Raine Study participants for whom full covariate data were available. Data are shown for PCA adjustment only ( $P_{\text{adj-PCA}}$ ), and with additional adjustment for covariates including daycare attendance <3 yrs ( $P_{\text{adj-daycare}}$ ), allergy at < 3yrs ( $P_{\text{adj-allergy}}$ ), non-exclusive breast feeding at <6 mths ( $P_{\text{adj-supp}}$ ), and all covariates ( $P_{\text{adj-allCov}}$ ). Key: Chr=chromosome, SNP=single nucleotide polymorphism, Position=bp position on Chr, A1/A2=alleles, N=number in analysis, effB= estimate of the  $\beta$  coefficient for each SNP, effBSE=standard error of effB, P1df=P-value for allele-wise test, OR=odds ratio, LL=lower 95% confidence interval, UL=upper 95% confidence interval. Estimates of effB (bold) for each SNP did not change appreciably across the analyses with adjustment for different covariates.

Children with covariate data, genotyped SNPs

| Chr | SNP        | Position  | A1 | A2 | N   | $P_{\text{adj-PCA}}$ |        |          |      |      | $P_{\text{adj-daycare}}$ |              |        |          |      | $P_{\text{adj-allergy}}$ |      |              |        |          | $P_{\text{adj-supp}}$ |      |      |              |        | $P_{\text{adj-allcov}}$ |      |      |      |              | CONSEQUENCE | HGNC     |        |      |      |                      |         |
|-----|------------|-----------|----|----|-----|----------------------|--------|----------|------|------|--------------------------|--------------|--------|----------|------|--------------------------|------|--------------|--------|----------|-----------------------|------|------|--------------|--------|-------------------------|------|------|------|--------------|-------------|----------|--------|------|------|----------------------|---------|
|     |            |           |    |    |     | effB                 | effBSE | P1df     | OR   | LL   | UL                       | effB         | effBSE | P1df     | OR   | LL                       | UL   | effB         | effBSE | P1df     | OR                    | LL   | UL   | effB         | effBSE | P1df                    | OR   | LL   | UL   | effB         |             |          | effBSE | P1df | OR   | LL                   | UL      |
| 2   | rs2098787  | 31150148  | G  | A  | 831 | <b>0.46</b>          | 0.11   | 3.17E-05 | 1.58 | 1.28 | 1.97                     | <b>0.48</b>  | 0.11   | 1.63E-05 | 1.62 | 1.30                     | 2.02 | <b>0.47</b>  | 0.11   | 2.10E-05 | 1.61                  | 1.29 | 2.00 | <b>0.48</b>  | 0.11   | 1.80E-05                | 1.61 | 1.30 | 2.01 | <b>0.51</b>  | 0.11        | 7.26E-06 | 1.66   | 1.33 | 2.08 | INTRONIC             | GALNT14 |
| 2   | rs1862981  | 31151028  | C  | A  | 831 | <b>0.47</b>          | 0.11   | 2.20E-05 | 1.60 | 1.29 | 1.99                     | <b>0.49</b>  | 0.11   | 1.10E-05 | 1.64 | 1.31                     | 2.04 | <b>0.48</b>  | 0.11   | 1.46E-05 | 1.62                  | 1.30 | 2.02 | <b>0.49</b>  | 0.11   | 1.29E-05                | 1.63 | 1.31 | 2.03 | <b>0.52</b>  | 0.11        | 5.10E-06 | 1.68   | 1.34 | 2.10 | INTRONIC             | GALNT14 |
| 2   | rs13408922 | 31298330  | C  | A  | 831 | <b>0.63</b>          | 0.17   | 2.31E-04 | 1.87 | 1.34 | 2.62                     | <b>0.63</b>  | 0.17   | 2.14E-04 | 1.88 | 1.35                     | 2.64 | <b>0.59</b>  | 0.17   | 6.60E-04 | 1.80                  | 1.28 | 2.52 | <b>0.67</b>  | 0.17   | 1.01E-04                | 1.96 | 1.39 | 2.74 | <b>0.64</b>  | 0.17        | 2.78E-04 | 1.88   | 1.34 | 2.65 | NMD_TRANS            | CAPN14  |
| 2   | rs13386745 | 31299119  | A  | G  | 831 | <b>0.62</b>          | 0.17   | 2.93E-04 | 1.85 | 1.33 | 2.58                     | <b>0.62</b>  | 0.17   | 2.60E-04 | 1.87 | 1.33                     | 2.61 | <b>0.57</b>  | 0.17   | 8.12E-04 | 1.78                  | 1.27 | 2.49 | <b>0.66</b>  | 0.17   | 1.24E-04                | 1.94 | 1.38 | 2.71 | <b>0.63</b>  | 0.17        | 2.39E-04 | 1.90   | 1.35 | 2.67 | NMD_TRANS            | CAPN14  |
| 2   | rs13386850 | 31299195  | A  | C  | 831 | <b>0.63</b>          | 0.17   | 2.31E-04 | 1.87 | 1.34 | 2.62                     | <b>0.63</b>  | 0.17   | 2.14E-04 | 1.88 | 1.35                     | 2.64 | <b>0.59</b>  | 0.17   | 6.60E-04 | 1.80                  | 1.28 | 2.52 | <b>0.67</b>  | 0.17   | 1.01E-04                | 1.96 | 1.39 | 2.74 | <b>0.64</b>  | 0.17        | 4.26E-03 | 2.19   | 1.28 | 3.74 | NMD_TRANS            | CAPN14  |
| 3   | rs17624623 | 61595506  | A  | G  | 830 | <b>0.47</b>          | 0.11   | 2.02E-05 | 1.60 | 1.29 | 1.98                     | <b>0.46</b>  | 0.11   | 3.26E-05 | 1.58 | 1.27                     | 1.96 | <b>0.46</b>  | 0.11   | 3.38E-05 | 1.58                  | 1.27 | 1.96 | <b>0.47</b>  | 0.11   | 2.47E-05                | 1.59 | 1.28 | 1.98 | <b>0.45</b>  | 0.11        | 5.67E-05 | 1.57   | 1.26 | 1.95 | INTRONIC             | PTPRG   |
| 7   | rs10242197 | 90097848  | G  | A  | 831 | <b>-0.61</b>         | 0.15   | 4.84E-05 | 0.54 | 0.41 | 0.73                     | <b>-0.59</b> | 0.15   | 9.79E-05 | 0.56 | 0.41                     | 0.75 | <b>-0.61</b> | 0.15   | 5.01E-05 | 0.54                  | 0.40 | 0.73 | <b>-0.62</b> | 0.15   | 4.23E-05                | 0.54 | 0.40 | 0.72 | <b>-0.60</b> | 0.15        | 7.81E-05 | 0.55   | 0.41 | 0.74 | INTRONIC             | CDK14   |
| 8   | rs2882460  | 62688450  | C  | A  | 831 | <b>0.51</b>          | 0.12   | 4.96E-05 | 1.66 | 1.30 | 2.12                     | <b>0.50</b>  | 0.13   | 7.57E-05 | 1.64 | 1.28                     | 2.10 | <b>0.49</b>  | 0.13   | 9.98E-05 | 1.63                  | 1.27 | 2.08 | <b>0.50</b>  | 0.13   | 5.55E-05                | 1.66 | 1.30 | 2.12 | <b>0.48</b>  | 0.13        | 1.42E-04 | 1.62   | 1.26 | 2.07 | INTRONIC             | ASPH    |
| 8   | rs6471969  | 62729386  | C  | A  | 831 | <b>0.60</b>          | 0.13   | 3.85E-06 | 1.83 | 1.42 | 2.37                     | <b>0.59</b>  | 0.13   | 6.33E-06 | 1.81 | 1.40                     | 2.34 | <b>0.59</b>  | 0.13   | 6.86E-06 | 1.81                  | 1.40 | 2.34 | <b>0.61</b>  | 0.13   | 3.73E-06                | 1.84 | 1.42 | 2.38 | <b>0.59</b>  | 0.13        | 9.38E-06 | 1.80   | 1.39 | 2.34 | INTRONIC             | ASPH    |
| 8   | rs11990408 | 62747549  | A  | G  | 831 | <b>0.57</b>          | 0.13   | 1.10E-05 | 1.76 | 1.37 | 2.27                     | <b>0.56</b>  | 0.13   | 1.85E-05 | 1.74 | 1.35                     | 2.25 | <b>0.56</b>  | 0.13   | 1.85E-05 | 1.74                  | 1.35 | 2.25 | <b>0.57</b>  | 0.13   | 1.21E-05                | 1.77 | 1.37 | 2.28 | <b>0.55</b>  | 0.13        | 2.92E-05 | 1.73   | 1.34 | 2.24 | INTRONIC             | ASPH    |
| 8   | rs11787089 | 62783393  | G  | A  | 831 | <b>0.63</b>          | 0.14   | 6.83E-06 | 1.88 | 1.43 | 2.47                     | <b>0.62</b>  | 0.14   | 1.00E-05 | 1.86 | 1.41                     | 2.45 | <b>0.61</b>  | 0.14   | 1.67E-05 | 1.83                  | 1.39 | 2.42 | <b>0.65</b>  | 0.14   | 4.54E-06                | 1.91 | 1.45 | 2.52 | <b>0.62</b>  | 0.14        | 1.48E-05 | 1.85   | 1.40 | 2.45 | INTRONIC             | ASPH    |
| 10  | rs16919668 | 20319164  | A  | G  | 829 | <b>-0.69</b>         | 0.17   | 3.28E-05 | 0.50 | 0.36 | 0.70                     | <b>-0.71</b> | 0.17   | 2.05E-05 | 0.49 | 0.35                     | 0.68 | <b>-0.68</b> | 0.17   | 4.56E-05 | 0.51                  | 0.37 | 0.70 | <b>-0.70</b> | 0.17   | 2.92E-05                | 0.50 | 0.36 | 0.69 | <b>-0.70</b> | 0.17        | 2.64E-05 | 0.49   | 0.36 | 0.69 | INTRONIC             | PLXDC2  |
| 13  | rs1336708  | 101763004 | A  | G  | 831 | <b>-0.56</b>         | 0.14   | 5.17E-05 | 0.57 | 0.44 | 0.75                     | <b>-0.55</b> | 0.14   | 6.67E-05 | 0.58 | 0.44                     | 0.76 | <b>-0.57</b> | 0.14   | 3.31E-05 | 0.56                  | 0.43 | 0.74 | <b>-0.54</b> | 0.14   | 8.73E-05                | 0.58 | 0.45 | 0.76 | <b>-0.55</b> | 0.14        | 7.20E-05 | 0.58   | 0.44 | 0.76 | INTRONIC             | FGF14   |
| 13  | rs4512966  | 109880059 | G  | A  | 830 | <b>0.44</b>          | 0.11   | 5.01E-05 | 1.55 | 1.25 | 1.91                     | <b>0.43</b>  | 0.11   | 7.18E-05 | 1.53 | 1.24                     | 1.90 | <b>0.43</b>  | 0.11   | 7.08E-05 | 1.53                  | 1.24 | 1.90 | <b>0.46</b>  | 0.11   | 2.52E-05                | 1.58 | 1.28 | 1.95 | <b>0.44</b>  | 0.11        | 4.91E-05 | 1.56   | 1.26 | 1.93 | INTRONIC             | COL4A2  |
| 15  | rs6493973  | 56079928  | G  | A  | 831 | <b>1.23</b>          | 0.30   | 4.40E-05 | 3.43 | 1.90 | 6.20                     | <b>1.22</b>  | 0.30   | 5.81E-05 | 3.38 | 1.87                     | 6.13 | <b>1.23</b>  | 0.30   | 4.94E-05 | 3.43                  | 1.89 | 6.22 | <b>1.22</b>  | 0.30   | 5.55E-05                | 3.40 | 1.88 | 6.17 | <b>1.21</b>  | 0.31        | 7.53E-05 | 3.36   | 1.84 | 6.13 | INTRONIC             | ALDH1A2 |
| 15  | rs2218261  | 56081314  | G  | A  | 831 | <b>1.23</b>          | 0.30   | 4.40E-05 | 3.43 | 1.90 | 6.20                     | <b>1.22</b>  | 0.30   | 5.81E-05 | 3.38 | 1.87                     | 6.13 | <b>1.23</b>  | 0.30   | 4.94E-05 | 3.43                  | 1.89 | 6.22 | <b>1.22</b>  | 0.30   | 5.55E-05                | 3.40 | 1.88 | 6.17 | <b>1.21</b>  | 0.31        | 7.53E-05 | 3.36   | 1.84 | 6.13 | INTRONIC             | ALDH1A2 |
| 15  | rs2704219  | 56115740  | A  | G  | 831 | <b>1.22</b>          | 0.30   | 3.72E-05 | 3.39 | 1.90 | 6.05                     | <b>1.20</b>  | 0.30   | 5.33E-05 | 3.32 | 1.86                     | 5.95 | <b>1.22</b>  | 0.30   | 4.44E-05 | 3.37                  | 1.88 | 6.04 | <b>1.23</b>  | 0.30   | 3.95E-05                | 3.41 | 1.90 | 6.11 | <b>1.20</b>  | 0.30        | 6.09E-05 | 3.33   | 1.85 | 6.01 | INTRONIC             | ALDH1A2 |
| 17  | rs4627412  | 76138839  | A  | G  | 831 | <b>0.46</b>          | 0.11   | 4.92E-05 | 1.58 | 1.27 | 1.96                     | <b>0.46</b>  | 0.11   | 4.63E-05 | 1.58 | 1.27                     | 1.97 | <b>0.45</b>  | 0.11   | 6.82E-05 | 1.57                  | 1.26 | 1.95 | <b>0.45</b>  | 0.11   | 5.64E-05                | 1.58 | 1.26 | 1.97 | <b>0.45</b>  | 0.11        | 7.70E-05 | 1.57   | 1.25 | 1.96 | INTRONIC             | RPTOR   |
| 17  | rs9911978  | 76139002  | A  | G  | 831 | <b>0.46</b>          | 0.11   | 4.92E-05 | 1.58 | 1.27 | 1.96                     | <b>0.46</b>  | 0.11   | 4.63E-05 | 1.58 | 1.27                     | 1.97 | <b>0.45</b>  | 0.11   | 6.82E-05 | 1.57                  | 1.26 | 1.95 | <b>0.45</b>  | 0.11   | 5.64E-05                | 1.58 | 1.26 | 1.97 | <b>0.45</b>  | 0.11        | 7.70E-05 | 1.57   | 1.25 | 1.96 | INTRONIC             | RPTOR   |
| 20  | rs17396317 | 31254038  | G  | A  | 831 | <b>0.59</b>          | 0.15   | 1.25E-04 | 1.81 | 1.34 | 2.45                     | <b>0.60</b>  | 0.16   | 1.21E-04 | 1.82 | 1.34                     | 2.46 | <b>0.60</b>  | 0.16   | 1.27E-04 | 1.81                  | 1.34 | 2.46 | <b>0.63</b>  | 0.16   | 5.87E-05                | 1.87 | 1.38 | 2.54 | <b>0.63</b>  | 0.16        | 6.51E-05 | 1.88   | 1.38 | 2.56 | WITHIN_pseudogene    | BPIFA4P |
| 20  | rs17305657 | 31270249  | A  | G  | 831 | <b>0.68</b>          | 0.17   | 8.64E-05 | 1.98 | 1.41 | 2.78                     | <b>0.69</b>  | 0.17   | 8.70E-05 | 1.99 | 1.41                     | 2.80 | <b>0.70</b>  | 0.18   | 6.95E-05 | 2.01                  | 1.42 | 2.83 | <b>0.73</b>  | 0.18   | 3.56E-05                | 2.07 | 1.47 | 2.92 | <b>0.74</b>  | 0.18        | 3.28E-05 | 2.10   | 1.48 | 2.97 | INTRONIC             | BPIFA3  |
| 20  | rs3818222  | 31276584  | A  | G  | 831 | <b>-0.38</b>         | 0.11   | 5.47E-04 | 0.68 | 0.55 | 0.85                     | <b>-0.40</b> | 0.11   | 4.12E-04 | 0.67 | 0.54                     | 0.84 | <b>-0.38</b> | 0.11   | 7.64E-04 | 0.69                  | 0.55 | 0.85 | <b>-0.38</b> | 0.11   | 5.86E-04                | 0.68 | 0.55 | 0.85 | <b>-0.39</b> | 0.11        | 3.28E-05 | 0.68   | 0.54 | 0.85 | NON_SYN_CODING       | BPIFA3  |
| 20  | rs6059169  | 31281265  | A  | C  | 831 | <b>0.42</b>          | 0.12   | 3.88E-04 | 1.53 | 1.21 | 1.93                     | <b>0.43</b>  | 0.12   | 3.60E-04 | 1.53 | 1.21                     | 1.94 | <b>0.41</b>  | 0.12   | 5.31E-04 | 1.51                  | 1.20 | 1.91 | <b>0.44</b>  | 0.12   | 2.33E-04                | 1.56 | 1.23 | 1.97 | <b>0.44</b>  | 0.12        | 6.04E-04 | 1.55   | 1.22 | 1.97 | DOWNSTREAM           | BPIFA1  |
| 20  | rs6059183  | 31289688  | A  | G  | 831 | <b>0.41</b>          | 0.12   | 5.32E-04 | 1.51 | 1.20 | 1.91                     | <b>0.42</b>  | 0.12   | 5.08E-04 | 1.52 | 1.20                     | 1.92 | <b>0.41</b>  | 0.12   | 7.03E-04 | 1.50                  | 1.19 | 1.90 | <b>0.43</b>  | 0.12   | 3.18E-04                | 1.54 | 1.22 | 1.95 | <b>0.43</b>  | 0.12        | 3.01E-04 | 1.54   | 1.21 | 1.95 | SPLICE_SITE,INTRONIC | BPIFA1  |
| 21  | rs2839520  | 42742732  | A  | G  | 831 | <b>-0.47</b>         | 0.11   | 1.63E-05 | 0.63 | 0.51 | 0.77                     | <b>-0.45</b> | 0.11   | 3.60E-05 | 0.64 | 0.52                     | 0.79 | <b>-0.46</b> | 0.11   | 2.01E-05 | 0.63                  | 0.51 | 0.78 | <b>-0.46</b> | 0.11   | 3.00E-05                | 0.63 | 0.51 | 0.79 | <b>-0.44</b> | 0.11        | 6.75E-05 | 0.65   | 0.52 | 0.80 | DOWNSTREAM           | UBASH3A |
