# Supplementary material for: Genome-Wide Association Study to Identify the Genetic Determinants of Otitis Media Susceptibility in Childhood
Source: PubMed Central journal article supplement (PMC3485007; doi:10.1371/journal.pone.0048215), 2012-10-25
Supplement: pone.0048215.s007.pdf [file pone.0048215.s007.pdf]

**Table S3.** SNPs/Genes selected for replication analysis in the WAFSOM cohort.

| <b>SNP</b> | <b>Gene</b> | <b>Chr</b> | <b>Position</b> | <b>Major/<br/>Minor</b> | <b>Ancestral<br/>Allele</b> |
|------------|-------------|------------|-----------------|-------------------------|-----------------------------|
| rs1862981  | GALNT14     | 2          | 31151028        | C/A                     | C                           |
| rs2113490  | GALNT14     | 2          | 31157651        | A/G                     | A                           |
| rs12621279 | GALNT14     | 2          | 31195804        | C/T                     | C                           |
| rs17010928 | CAPN14      | 2          | 31268558        | G/A                     | G                           |
| rs6728152  | CAPN14      | 2          | 31285155        | T/C                     | T                           |
| rs13408922 | CAPN14      | 2          | 31298330        | C/A                     | A                           |
| rs11684139 | GALNT13     | 2          | 154725951       | T/G                     | T                           |
| rs707069   | GALNT13     | 2          | 155005699       | T/C                     | T                           |
| rs799822   | GALNT13     | 2          | 155007126       | G/A                     | A                           |
| rs16887121 | BMP5        | 6          | 55746041        | A/G                     | G                           |
| rs10456718 | BMP5        | 6          | 55768837        | T/C                     | T                           |
| rs1470527  | BMP5        | 6          | 55819170        | C/T                     | T                           |
| rs11025841 | NELL1       | 11         | 20948783        | A/C                     | A                           |
| rs1914243  | NELL1       | 11         | 20971341        | A/C                     | A                           |
| rs1945331  | NELL1       | 11         | 21220418        | C/T                     | C                           |
| rs3917192  | TGFB3       | 14         | 75501427        | G/A                     | G                           |
| rs2284792  | TGFB3       | 14         | 75513332        | A/G                     | G                           |
| rs2268626  | TGFB3       | 14         | 75514520        | T/C                     | T                           |
| rs6059183  | BPIFA1      | 20         | 31289688        | T/C                     | T                           |
| rs6059187  | BPIFA1      | 20         | 31291926        | G/A                     | G                           |
