# Supplementary material for: Genome-Wide Association Study to Identify the Genetic Determinants of Otitis Media Susceptibility in Childhood
Source: PubMed Central journal article supplement (PMC3485007; doi:10.1371/journal.pone.0048215), 2012-10-25
Supplement: pone.0048215.s008.pdf [file pone.0048215.s008.pdf]

**Table S4.** Replication of selected genes in the WAFSOM cohort using case/pseudo-control conditional logistic regression under an additive model. Where possible, tag-SNPs were selected to match SNPs genotyped in the Raine cohort. For some genes we selected additional tag-SNPs to cover areas of the gene not well covered on the SNP-chip used to analyse Raine.  $P_{\text{adj-PCA}}$  values from the Raine cohort are provided for ease of comparison.

| SNP                | Chr | Major/Minor | MAF  | Risk Allele | Robust P-Value | Odds Ratio <sup>a</sup> (95% CI) | Raine $P_{\text{adjPCA}}$ |
|--------------------|-----|-------------|------|-------------|----------------|----------------------------------|---------------------------|
| GALNT14_rs1862981  | 2   | C/A         | 0.45 | C           | 0.412          | 1.06 (0.92 - 1.23)               | 0.0036                    |
| GALNT14_rs2113490  | 2   | A/G         | 0.46 | G           | 0.653          | 1.03 (0.89 - 1.19)               | 0.0018                    |
| GALNT14_rs12621279 | 2   | C/T         | 0.36 | C           | 0.502          | 1.06 (0.90 - 1.25)               | 0.0055                    |
| CAPN14_rs17010928  | 2   | G/A         | 0.08 | G           | 0.522          | 1.10 (0.82 - 1.49)               | $9.85 \times 10^{-5}$     |
| CAPN14_rs6728152   | 2   | T/C         | 0.04 | T           | 0.058          | 1.43 (0.99 - 2.07)               | $1.75 \times 10^{-4}$     |
| CAPN14_rs13408922  | 2   | C/A         | 0.10 | C           | 0.092          | 1.23 (0.97 - 1.57)               | $1.32 \times 10^{-6}$     |
| GALNT13_rs11684139 | 2   | T/G         | 0.25 | T           | 0.759          | 1.03 (0.86 - 1.24)               | 0.0023                    |
| GALNT13_rs707069   | 2   | T/C         | 0.12 | T           | 0.223          | 1.16 (0.91 - 1.47)               | 0.0069                    |
| GALNT13_rs799822   | 2   | G/A         | 0.08 | G           | 0.132          | 1.24 (0.94 - 1.65)               | -                         |
| BMP5_rs16887121    | 6   | A/G         | 0.07 | A           | 0.811          | 1.04 (0.77 - 1.39)               | 0.007                     |
| BMP5_rs10456718    | 6   | T/C         | 0.23 | C           | 0.755          | 1.03 (0.87 - 1.22)               | -                         |
| BMP5_rs1470527     | 6   | C/T         | 0.40 | T           | 0.378          | 1.07 (0.92 - 1.24)               | 0.0031                    |
| NELL1_rs11025841   | 11  | A/C         | 0.09 | A           | 0.540          | 1.08 (0.84 - 1.39)               | -                         |
| NELL1_rs1914243    | 11  | A/C         | 0.18 | N/A         | 1.000          | 1.00 (0.82 - 1.22)               | -                         |
| NELL1_rs1945331    | 11  | C/T         | 0.17 | T           | 0.222          | 1.13 (0.93 - 1.38)               | 0.0027                    |
| TGFB3_rs3917192    | 14  | G/A         | 0.16 | A           | 0.278          | 1.12 (0.91 - 1.37)               | 0.0022                    |
| TGFB3_rs2284792    | 14  | A/G         | 0.26 | N/A         | 1.000          | 1.00 (0.85 - 1.17)               | -                         |
| TGFB3_rs2268626    | 14  | T/C         | 0.20 | C           | 0.330          | 1.09 (0.91 - 1.31)               | -                         |
| BPIFA1_rs6059183   | 20  | T/C         | 0.26 | N/A         | 1.000          | 1.00 (0.84 - 1.19)               | $6.72 \times 10^{-4}$     |
| BPIFA1_rs6059187   | 20  | G/A         | 0.49 | A           | 0.511          | 1.05 (0.90 - 1.23)               | -                         |

Where MAF = minor allele frequency in WAFSOM, CI = 95% confidence intervals.

<sup>a</sup> - Odds ratios are shown for the risk allele.
