# Supplementary material for: Genome-Wide Association Study to Identify the Genetic Determinants of Otitis Media Susceptibility in Childhood
Source: PLOS journal article supplement (doi:10.1371/journal.pone.0048215), 2012-10-25

**Figure S4.** Comparison of LD patterns in replicated genes between the Raine Study and WAFSOM cohorts.

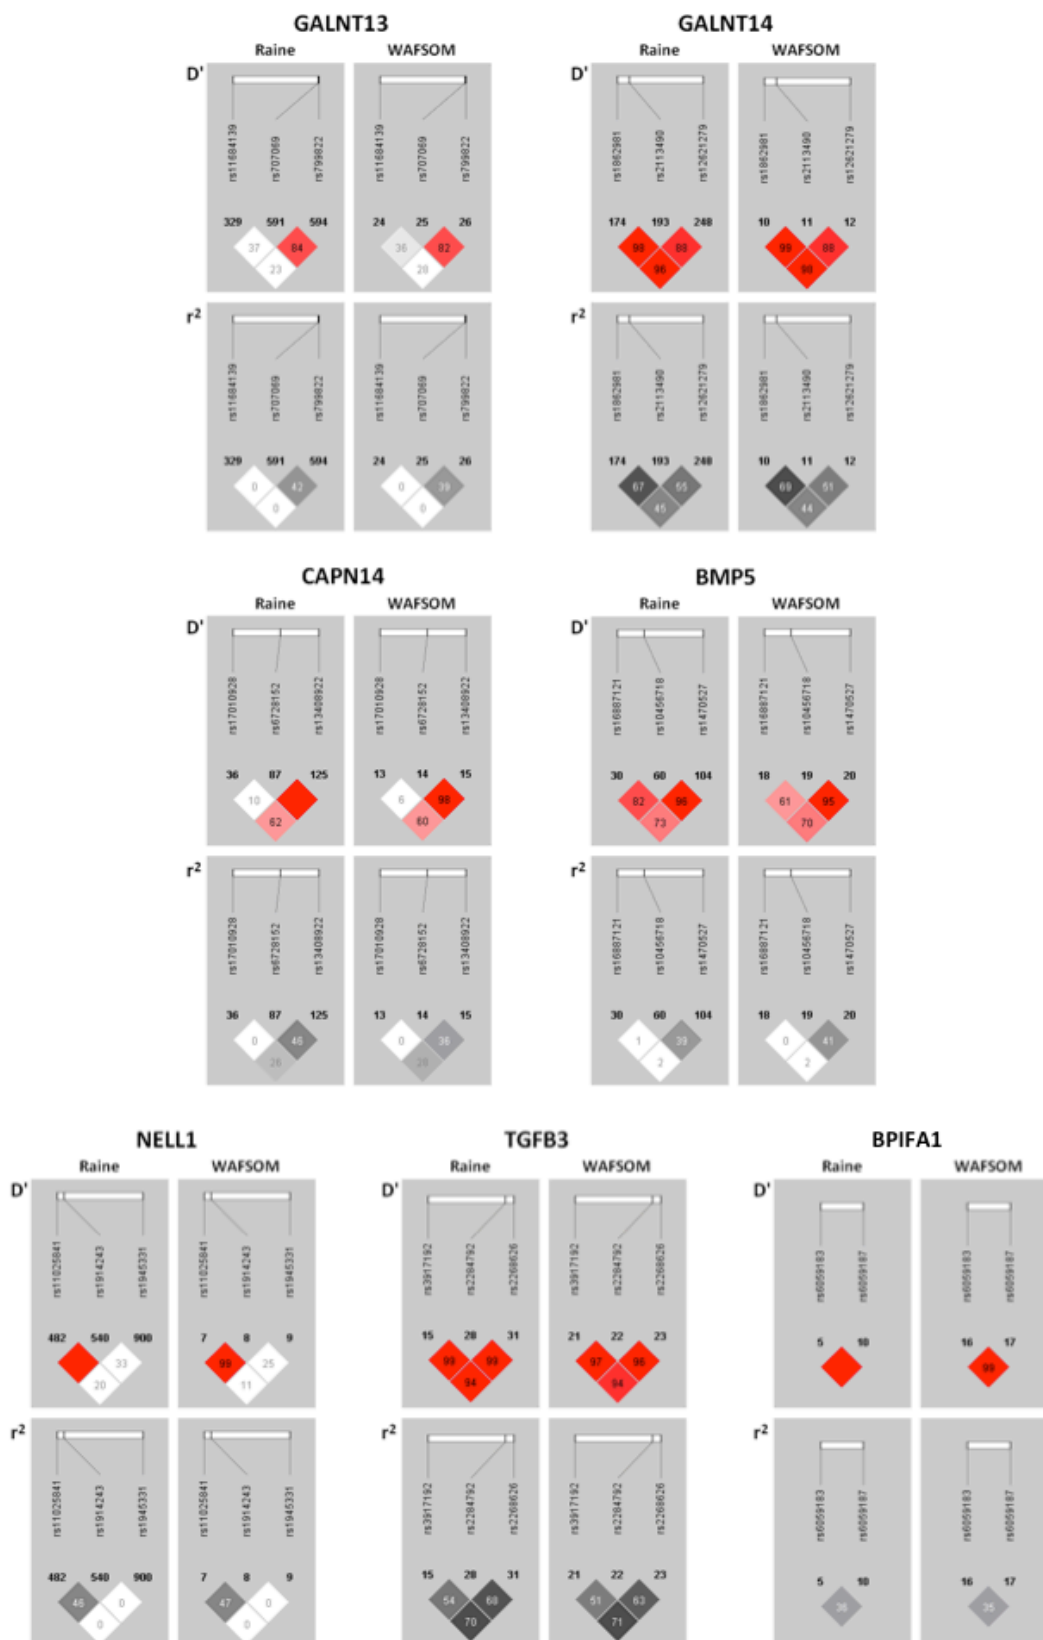

Supplement: S4 (10.1371/journal.pone.0048215.s004) [file journal.pone.0048215.s004]
